# Supplementary material for: CARD19 Interacts with Mitochondrial Contact Site and Cristae Organizing System Constituent Proteins and Regulates Cristae Morphology
Source: MDPI journal article supplement (doi:10.3390/cells11071175), 2022-03-31
Supplement: s1 [file s1]

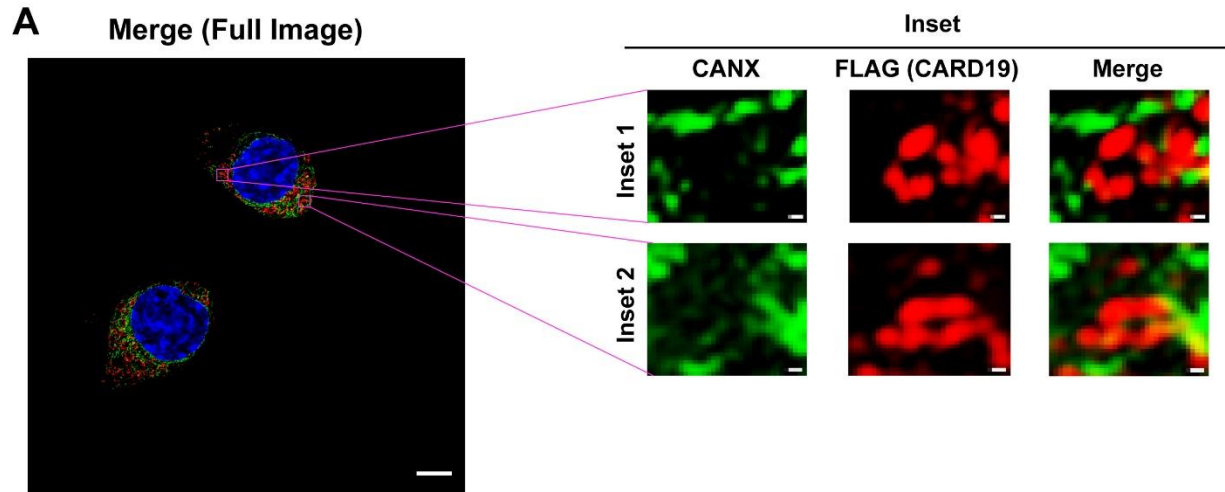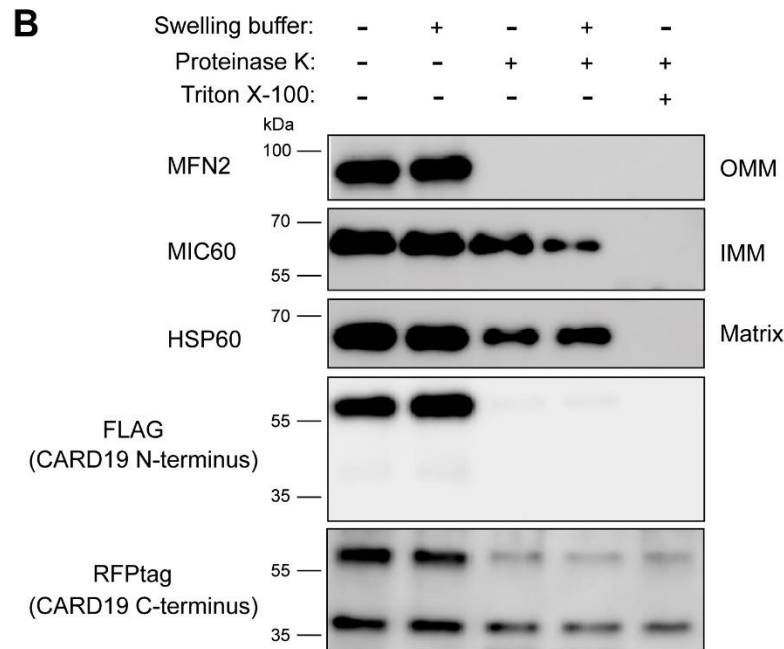

**Supplemental Figure S1: CARD19 is an outer mitochondrial membrane protein that may contact the endoplasmic reticulum.** (A) *Card19*<sup>-/-</sup> immortalized macrophages reconstituted with 3xFLAG-CARD19 were labeled with anti-Calnexin (CANX) and anti-FLAG and imaged via SIM. Insets are maximum intensity projections of position subsets within the acquired z-stack (inset 1: positions 13 - 16; inset 2: positions 13 - 16; inset 3: positions 16 - 21). Scale bars in full-sized images correspond to 5  $\mu$ m. Scale bars in the inset images correspond to 0.1  $\mu$ m. (B) Mitochondria were isolated from a *Card19*<sup>-/-</sup> fibroblast cell line stably expressing 3xFLAG-CARD19-TagRFP-T using a Qiagen Q proteome mitochondrial isolation kit and probed for the indicated proteins via western blot. Equal concentrations of mitochondria were left untreated or treated with Proteinase K (50  $\mu$ g/ml) in the presence or absence of swelling buffer or Triton X-100 (1%) for 20 minutes on ice.

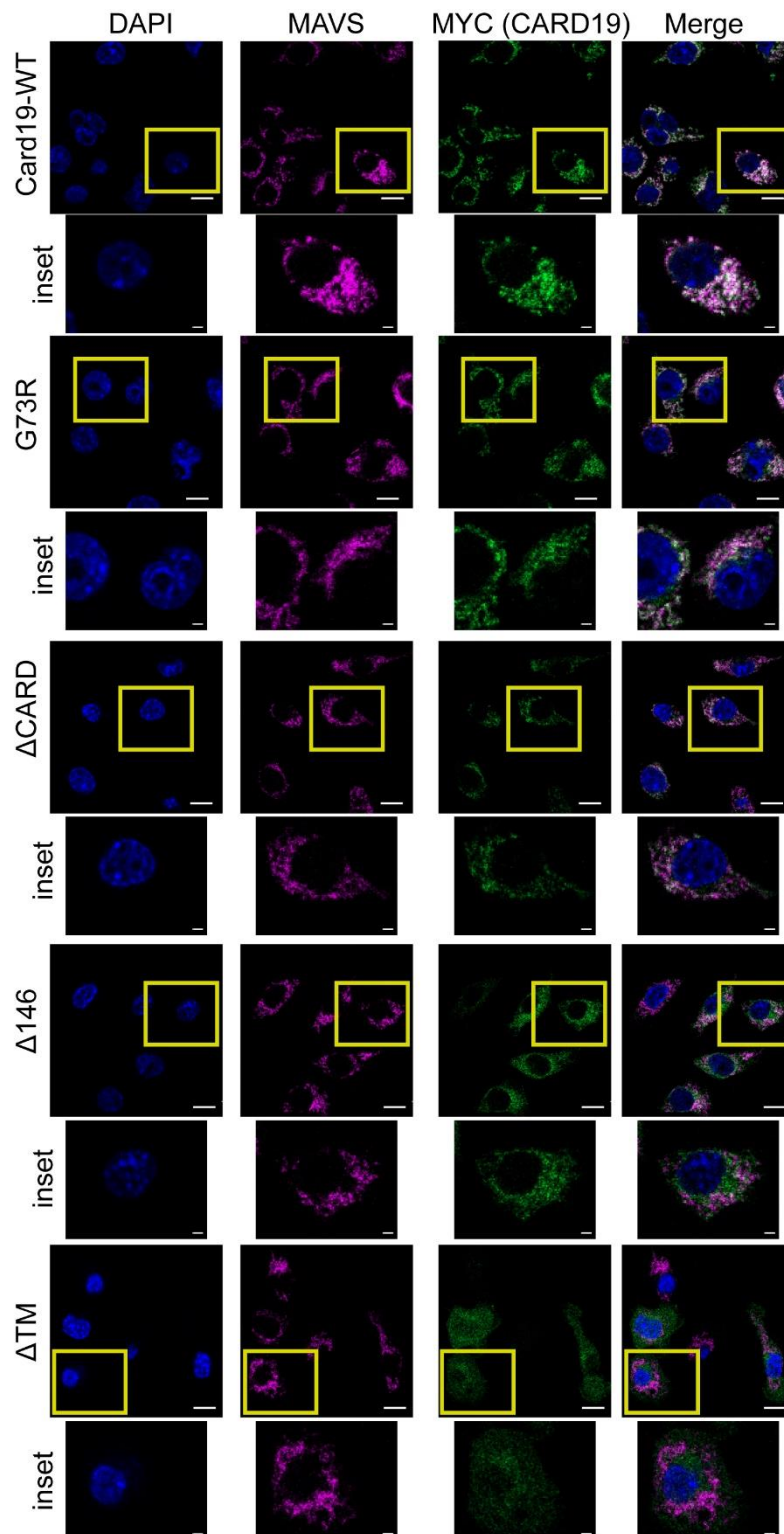

**Supplemental Figure S2: Myc-tagged CARD19 and MAVS exhibit similar patterns of mitochondrial distribution.** *Card19*<sup>-/-</sup> immortalized macrophages ectopically expressing MYC-tagged mutants of CARD19 were probed for anti-MYC and anti-MAVS, an outer mitochondrial

membrane (OMM) marker, and imaged via SIM. Insets correspond to yellow boxes in the full images. Scale bars correspond to 2  $\mu\text{m}$  in full images and 0.2  $\mu\text{m}$  in insets.

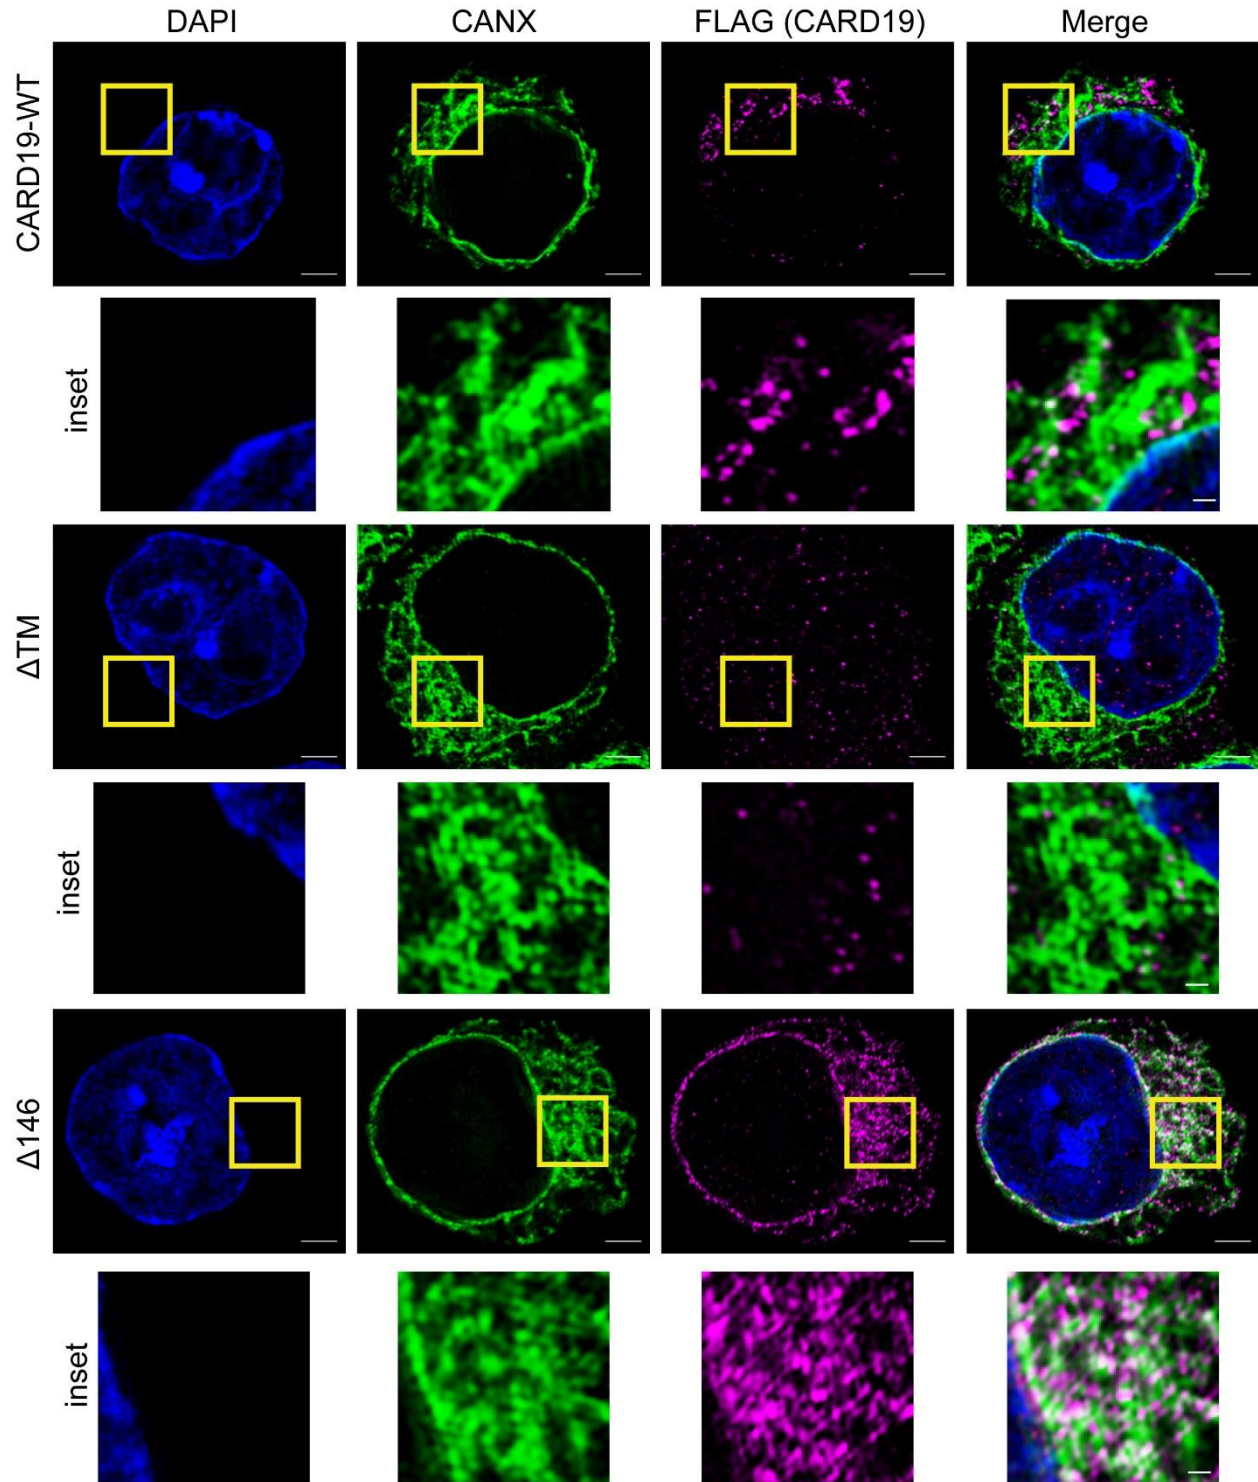

**Supplemental Figure S3: The CARD19- $\Delta 146$  mutant exhibits a subcellular distribution pattern similar to the ER marker Calnexin.** *Card19*<sup>-/-</sup> immortalized macrophages ectopically expressing FLAG-tagged WT and mutant forms of CARD19 were probed for anti-FLAG and

anti-CANX, an endoplasmic reticulum marker, and imaged via SIM. Insets correspond to yellow boxes in the full images. Scale bars correspond to 5  $\mu\text{m}$  in full images and 0.2  $\mu\text{m}$  in insets.

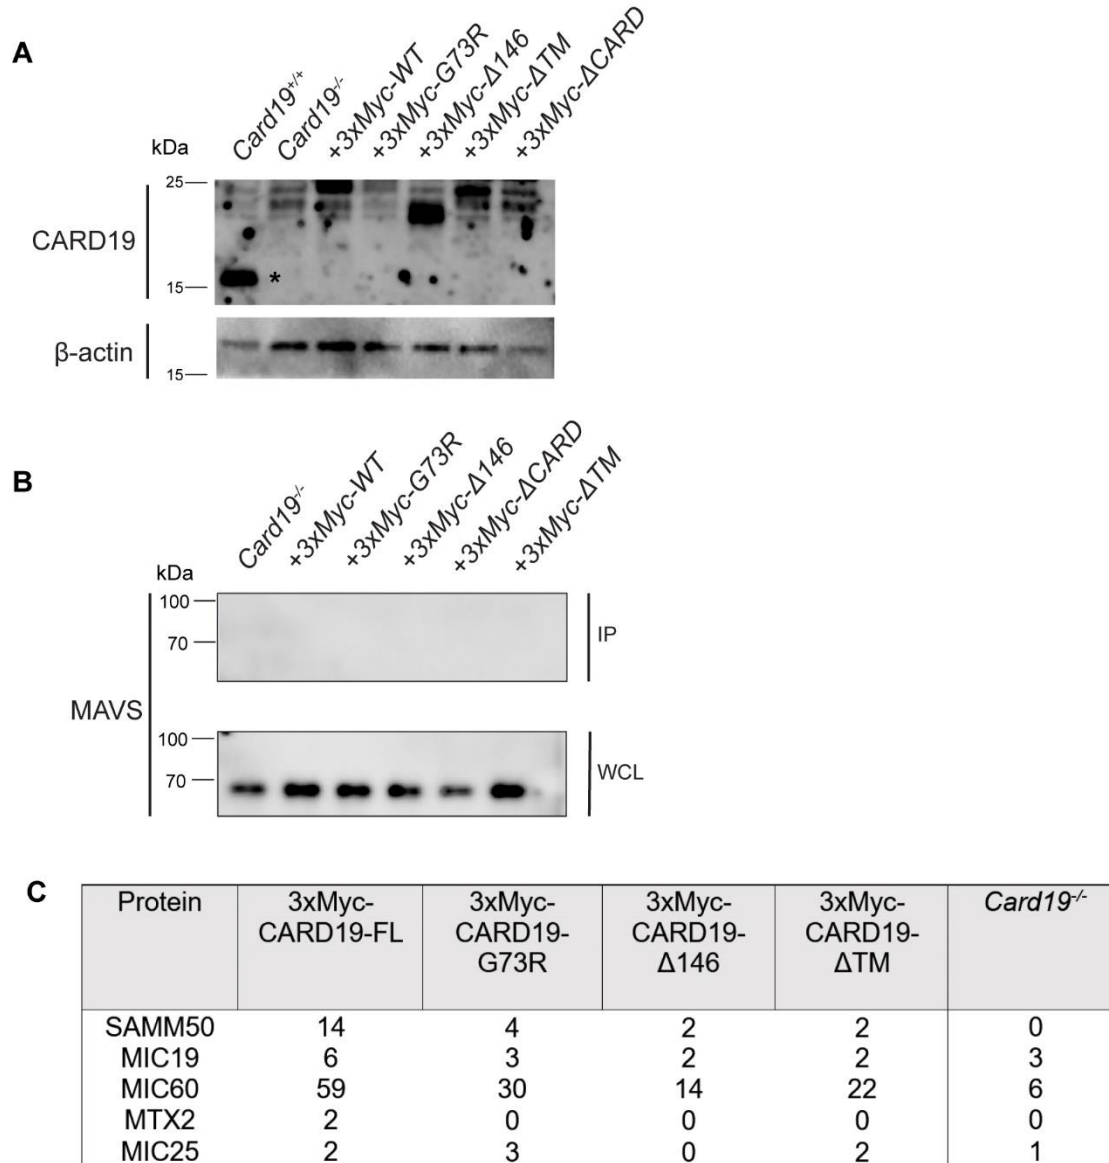

**Supplemental Figure S4: Mass spectrometry analysis indicates decreased association of CARD19 mutants with MICOS complex proteins.** (A) *Card19*<sup>-/-</sup> immortalized macrophages ectopically expressing 3xMyc-CARD19-FL or derivative mutants were lysed, cleared via centrifugation, immunoprecipitated with ChromoTek Myc affinity or control beads, and analyzed via mass spectrometry. (B) *Card19*<sup>-/-</sup> immortalized macrophages expressing 3xMyc-CARD19-WT or the indicated mutants were lysed, cleared via centrifugation, pre-cleared with Sepharose G beads, incubated with an anti-Myc antibody, and incubated with Sepharose G beads. Immunoprecipitates and whole cell lysates were then run on 4-20% Tris-glycine gels, transferred to nitrocellulose membrane, and immunoblotted with anti-MAVS. (C) Whole cell lysates of *Card19*<sup>+/+</sup> and *Card19*<sup>-/-</sup> immortalized macrophages expressing 3xMyc-CARD19-WT or the

indicated mutants were analyzed via western blotting for endogenous and ectopic CARD19, as well as  $\beta$ -actin. \* denotes endogenous, untagged CARD19.

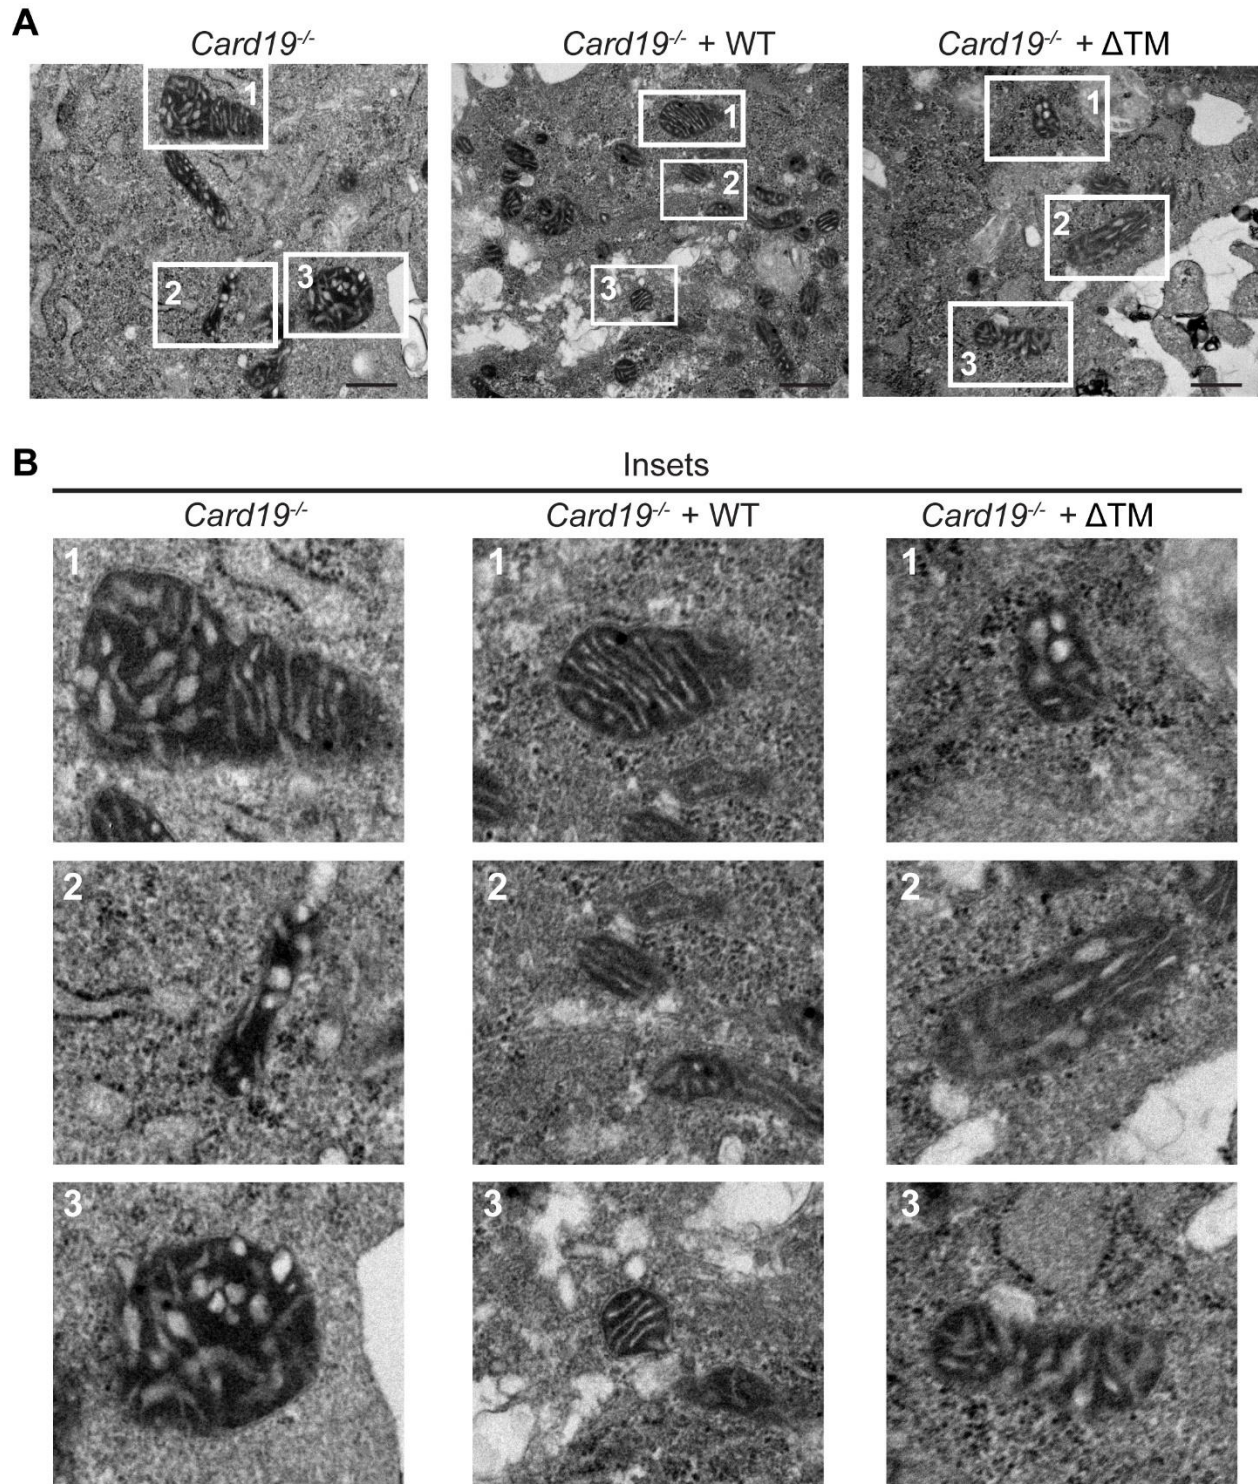

**Supplemental Figure S5: *Card19<sup>-/-</sup>* fibroblasts exhibit irregular cristae morphology.** (A) TEM was used to visualize mitochondrial ultrastructure in *Card19<sup>-/-</sup>* fibroblasts, or *Card19<sup>-/-</sup>*

fibroblasts stably expressing either untagged CARD19-WT or CARD19- $\Delta$ TM. *Card19*<sup>-/-</sup> and *Card19*<sup>-/-</sup> + CARD19- $\Delta$ TM exhibit swollen, vesicular, and irregular cristae. In contrast, *Card19*<sup>-/-</sup> + CARD19-WT fibroblasts contained mitochondria with a lamellar morphology. Scale bars are 500 nm. (B) Insets of mitochondria corresponding to the white boxed regions in A.
