# Supplementary material for: CARD19 Interacts with Mitochondrial Contact Site and Cristae Organizing System Constituent Proteins and Regulates Cristae Morphology
Source: MDPI journal article supplement (doi:10.3390/cells11071175), 2022-03-31
Supplement: s1 [file s1]

Supplemental Table S1. 3xMyc-CARD19 IP-Mass spec results (significant results only, p&lt;0.05)

| protein                                                                                         | accession    | Normalized<br>Myc_nanobody (A) | Normalized<br>Resin only (B) | ratio (A/B) | log2 ratio | z score | p-value  |
|-------------------------------------------------------------------------------------------------|--------------|--------------------------------|------------------------------|-------------|------------|---------|----------|
| Pre-mRNA-processing factor 40 homolog A OS=Mus musculus GN=Prpf40a PE=1 SV=1                    | Q9R1C7       | 159.35                         | 1                            | 159.35      | 7.32       | 5.61    | 2.05E-08 |
| DENN domain-containing protein 4C OS=Mus musculus GN=Dennd4c PE=1 SV=1                          | A6H8H2       | 107.56                         | 0                            | 117.56      | 6.88       | 5.27    | 1.4E-07  |
| Caspase recruitment domain-containing protein 9 OS=Mus musculus GN=Card9 PE=1 SV=1              | A2AIV8       | 62.74                          | 0                            | 62.74       | 5.97       | 4.56    | 5.16E-06 |
| E3 UFM1-protein ligase 1 OS=Mus musculus GN=Ufl1 PE=1 SV=2                                      | Q8CCJ3       | 60.75                          | 0                            | 61.75       | 5.95       | 4.54    | 5.61E-06 |
| Centrosomal protein of 170 kDa OS=Mus musculus GN=Cep170 PE=1 SV=2                              | Q6A065       | 53.78                          | 0                            | 53.78       | 5.75       | 4.38    | 1.16E-05 |
| Telomere-associated protein RIF1 OS=Mus musculus GN=Rif1 PE=1 SV=2                              | Q6PR54       | 50.79                          | 0                            | 51.79       | 5.69       | 4.34    | 1.41E-05 |
| Tyrosine-protein phosphatase non-receptor type substrate 1 OS=Mus musculus GN=Sirpa PE=1 SV=    | P97797       | 51.79                          | 0                            | 51.79       | 5.69       | 4.34    | 1.41E-05 |
| Forkhead box protein P1 OS=Mus musculus GN=Foxp1 PE=1 SV=1                                      | P58462       | 40.83                          | 0                            | 41.83       | 5.39       | 4.10    | 4.09E-05 |
| Stromal interaction molecule 1 OS=Mus musculus GN=Stim1 PE=1 SV=2                               | P70302       | 41.83                          | 0                            | 41.83       | 5.39       | 4.10    | 4.1E-05  |
| Calcium-binding mitochondrial carrier protein Aralar1 OS=Mus musculus GN=Slc25a12 PE=1 SV=1     | Q8BH59       | 80.67                          | 2                            | 40.84       | 5.35       | 4.07    | 4.6E-05  |
| RNA-binding protein 25 OS=Mus musculus GN=Rbm25 PE=1 SV=2                                       | B2RY56       | 170.30                         | 5                            | 34.26       | 5.10       | 3.88    | 0.000106 |
| Serine/threonine-protein phosphatase PGAM5, mitochondrial OS=Mus musculus GN=Pgam5 PE=1 SV=1    | Q8BX10       | 33.86                          | 1                            | 33.86       | 5.08       | 3.86    | 0.000111 |
| Ral GTPase-activating protein subunit alpha-2 OS=Mus musculus GN=Ralgapa2 PE=1 SV=2             | A3KGS3       | 30.87                          | 0                            | 31.87       | 4.99       | 3.80    | 0.000147 |
| Zinc finger CCH domain-containing protein 18 OS=Mus musculus GN=Zc3h18 PE=1 SV=1                | Q0P678       | 29.88                          | 1                            | 29.88       | 4.90       | 3.72    | 0.000197 |
| Inosine 5'-monophosphate dehydrogenase 1 OS=Mus musculus GN=Impdh1 PE=1 SV=2                    | P50096       | 27.89                          | 0                            | 27.89       | 4.80       | 3.65    | 0.000267 |
| CDK5 regulatory subunit-associated protein 3 OS=Mus musculus GN=Cdk5rap3 PE=1 SV=1              | Q99LM2       | 26.89                          | 0                            | 26.89       | 4.75       | 3.60    | 0.000313 |
| Eukaryotic translation initiation factor 4B OS=Mus musculus GN=EIF4b PE=1 SV=1                  | Q8BGD9       | 159.35                         | 6                            | 26.56       | 4.73       | 3.59    | 0.00033  |
| Calcium-binding mitochondrial carrier protein Aralar2 OS=Mus musculus GN=Slc25a13 PE=1 SV=1     | Q9QX44       | 78.68                          | 3                            | 26.23       | 4.71       | 3.58    | 0.000348 |
| Afadin OS=Mus musculus GN=Mlt4 PE=1 SV=3                                                        | Q9QZQ1       | 25.89                          | 0                            | 25.89       | 4.69       | 3.56    | 0.000368 |
| Caspase recruitment domain-containing protein 19 OS=Mus musculus GN=Card19 PE=1 SV=1; 3xMyc     | Q9D112; MYC  | 25.89                          | 0                            | 25.89       | 4.69       | 3.56    | 0.000368 |
| Sorting and assembly machinery component 50 homolog OS=Mus musculus GN=Samm50 PE=1 SV=          | Q8BGH2       | 25.89                          | 0                            | 25.89       | 4.69       | 3.56    | 0.000368 |
| DDRCK domain-containing protein 1 OS=Mus musculus GN=Ddrck1 PE=1 SV=2                           | Q8OWW9       | 24.90                          | 0                            | 24.90       | 4.64       | 3.52    | 0.000435 |
| ATP synthase subunit alpha, mitochondrial OS=Mus musculus GN=Atp5a1 PE=1 SV=1                   | Q03265       | 162.34                         | 7                            | 23.19       | 4.54       | 3.44    | 0.000586 |
| Brain-specific angiogenesis inhibitor 1-associated protein 2 OS=Mus musculus GN=Baiap2 PE=1 SV= | Q8BKX1       | 22.91                          | 0                            | 22.92       | 4.52       | 3.42    | 0.000616 |
| MICOS complex subunit Mic19 OS=Mus musculus GN=Chchd3 PE=1 SV=1                                 | Q9CRB9       | 22.91                          | 0                            | 22.92       | 4.52       | 3.42    | 0.000616 |
| MICOS complex subunit Mic25 OS=Mus musculus GN=Chchd6 PE=1 SV=2                                 | Q91VN4       | 22.91                          | 1                            | 22.92       | 4.52       | 3.42    | 0.000616 |
| DNA methyltransferase 1-associated protein 1 OS=Mus musculus GN=Dmap1 PE=1 SV=1                 | Q9JI44       | 20.91                          | 0                            | 21.91       | 4.45       | 3.37    | 0.00074  |
| Nuclear factor of activated T-cells 5 OS=Mus musculus GN=Nfat5 PE=1 SV=2                        | Q9WV30       | 20.91                          | 0                            | 21.91       | 4.45       | 3.37    | 0.00074  |
| Reticulocalbin-2 OS=Mus musculus GN=Rcn2 PE=1 SV=1                                              | Q8BP92       | 19.92                          | 0                            | 19.92       | 4.32       | 3.27    | 0.001087 |
| Serine/arginine repetitive matrix protein 2 OS=Mus musculus GN=Srrm2 PE=1 SV=3                  | Q8BT18       | 18.92                          | 0                            | 18.92       | 4.24       | 3.21    | 0.001331 |
| Inosine 5'-monophosphate dehydrogenase 2 OS=Mus musculus GN=Impdh2 PE=1 SV=2                    | P24547       | 145.41                         | 8                            | 18.18       | 4.18       | 3.16    | 0.001557 |
| Transcription factor 25 OS=Mus musculus GN=Tcf25 PE=1 SV=2                                      | Q8R3L2       | 17.93                          | 0                            | 17.93       | 4.16       | 3.15    | 0.001642 |
| B-cell differentiation antigen CD72 OS=Mus musculus GN=Cd72 PE=1 SV=2                           | P21855       | 16.93                          | 0                            | 16.93       | 4.08       | 3.08    | 0.002042 |
| Leucine zipper protein 1 OS=Mus musculus GN=Luzp1 PE=1 SV=2                                     | Q8R4U7       | 16.93                          | 0                            | 16.93       | 4.08       | 3.08    | 0.002042 |
| Nuclear receptor corepressor 1 OS=Mus musculus GN=Ncor1 PE=1 SV=1                               | Q60974       | 16.93                          | 0                            | 16.93       | 4.08       | 3.08    | 0.002042 |
| Metaxin-2 OS=Mus musculus GN=Mtx2 PE=1 SV=1                                                     | O88441       | 15.93                          | 0                            | 15.93       | 3.99       | 3.02    | 0.002564 |
| MICOS complex subunit Mic60 OS=Mus musculus GN=Immt PE=1 SV=1                                   | Q8CAQ8       | 170.30                         | 11                           | 15.57       | 3.96       | 2.99    | 0.002791 |
| Histone deacetylase 9 OS=Mus musculus GN=Hdac9 PE=1 SV=2                                        | Q99N13       | 13.94                          | 0                            | 13.94       | 3.80       | 2.87    | 0.004165 |
| Pre-mRNA-processing factor 40 homolog B OS=Mus musculus GN=Prpf40b PE=1 SV=2                    | Q8OW14       | 13.94                          | 0                            | 13.94       | 3.80       | 2.87    | 0.004165 |
| DNA annealing helicase and endonuclease ZRANB3 OS=Mus musculus GN=Zranb3 PE=1 SV=1              | Q6NZP1       | 12.95                          | 0                            | 12.95       | 3.69       | 2.78    | 0.005403 |
| GTPase-activating protein and VPS9 domain-containing protein 1 OS=Mus musculus GN=Gapvd1 PE=    | Q6PAR5       | 10.96                          | 0                            | 11.96       | 3.58       | 2.69    | 0.007097 |
| NADH-ubiquinone oxidoreductase 75 kDa subunit, mitochondrial OS=Mus musculus GN=Ndufs1 PE=      | Q91VD9       | 10.96                          | 0                            | 11.96       | 3.58       | 2.69    | 0.007097 |
| WAS/WASL-interacting protein family member 1 OS=Mus musculus GN=Wipf1 PE=1 SV=1                 | Q8K117       | 10.96                          | 1                            | 11.96       | 3.58       | 2.69    | 0.007097 |
| Cyclin-K OS=Mus musculus GN=Ccnk PE=1 SV=3                                                      | O88874       | 9.96                           | 0                            | 9.96        | 3.32       | 2.49    | 0.012894 |
| DNA-directed RNA polymerase III subunit RPC5 OS=Mus musculus GN=Polr3e PE=1 SV=2                | Q9CZ74       | 9.96                           | 0                            | 9.96        | 3.32       | 2.49    | 0.012894 |
| Gasdermin-A OS=Mus musculus GN=Gsdma PE=2 SV=1                                                  | Q9EST1       | 9.96                           | 0                            | 9.96        | 3.32       | 2.49    | 0.012894 |
| M-phase phosphoprotein 9 OS=Mus musculus GN=Mphosph9 PE=2 SV=1                                  | A6H5Y1       | 9.96                           | 0                            | 9.96        | 3.32       | 2.49    | 0.012894 |
| AP-3 complex subunit beta-1 OS=Mus musculus GN=Ap3b1 PE=1 SV=2                                  | Q9Z1T1       | 45.81                          | 5                            | 9.16        | 3.20       | 2.39    | 0.016719 |
| Inosine 5'-monophosphate dehydrogenase 1 OS=Mus musculus GN=Impdh1 PE=1 SV=2; Inosine 5'-       | P50096; P245 | 8.96                           | 0                            | 8.96        | 3.16       | 2.37    | 0.01788  |
| LETM1 and EF-hand domain-containing protein 1, mitochondrial OS=Mus musculus GN=Letm1 PE=1      | Q9Z210       | 8.96                           | 1                            | 8.96        | 3.16       | 2.37    | 0.01788  |
| Pericentriolar material 1 protein OS=Mus musculus GN=Pcm1 PE=1 SV=2                             | Q9R0L6       | 8.96                           | 0                            | 8.96        | 3.16       | 2.37    | 0.01788  |
| Polymerase delta-interacting protein 3 OS=Mus musculus GN=Poldip3 PE=1 SV=1                     | Q8BG81       | 8.96                           | 1                            | 8.96        | 3.16       | 2.37    | 0.01788  |
| COBW domain-containing protein 1 OS=Mus musculus GN=Cbw1 PE=1 SV=1                              | Q8VEH6       | 7.97                           | 0                            | 7.97        | 2.99       | 2.24    | 0.025384 |
| Cyclin-dependent kinase 13 OS=Mus musculus GN=Cdk13 PE=1 SV=3                                   | Q69ZA1       | 7.97                           | 0                            | 7.97        | 2.99       | 2.24    | 0.025384 |
| SH3 domain-containing kinase-binding protein 1 OS=Mus musculus GN=Sh3kbp1 PE=1 SV=1             | Q8R550       | 7.97                           | 0                            | 7.97        | 2.99       | 2.24    | 0.025384 |
| Smith-Magenis syndrome chromosomal region candidate gene 8 protein homolog OS=Mus musculu       | Q3UMB5       | 7.97                           | 0                            | 7.97        | 2.99       | 2.24    | 0.025384 |
| YEATS domain-containing protein 4 OS=Mus musculus GN=Yeats4 PE=2 SV=1                           | Q9CR11       | 7.97                           | 0                            | 7.97        | 2.99       | 2.24    | 0.025384 |
| Calcium-binding mitochondrial carrier protein Aralar1 OS=Mus musculus GN=Slc25a12 PE=1 SV=1; (  | Q8BH59; Q9Q  | 21.91                          | 3                            | 7.30        | 2.87       | 2.14    | 0.032547 |
| 14-3-3 protein zeta/delta OS=Mus musculus GN=Ywhaz PE=1 SV=1                                    | P63101       | 6.97                           | 1                            | 6.97        | 2.80       | 2.09    | 0.03705  |
| Coiled-coil and C2 domain-containing protein 1B OS=Mus musculus GN=Cc2d1b PE=1 SV=1             | Q8BRN9       | 6.97                           | 0                            | 6.97        | 2.80       | 2.09    | 0.03705  |
| Complement component 1 Q subcomponent-binding protein, mitochondrial OS=Mus musculus GN=        | O35658       | 6.97                           | 1                            | 6.97        | 2.80       | 2.09    | 0.03705  |
| Cytochrome c oxidase subunit 2 OS=Mus musculus GN=Mtco2 PE=1 SV=1                               | P00405       | 6.97                           | 0                            | 6.97        | 2.80       | 2.09    | 0.03705  |
| Endoplasmic reticulum resident protein 29 OS=Mus musculus GN=Erp29 PE=1 SV=2                    | P57759       | 6.97                           | 0                            | 6.97        | 2.80       | 2.09    | 0.03705  |
| Homeobox protein cut-like 1 OS=Mus musculus GN=Cux1 PE=1 SV=3                                   | P53564       | 6.97                           | 0                            | 6.97        | 2.80       | 2.09    | 0.03705  |
| Lamina-associated polypeptide 2, isoforms beta/delta/epsilon/gamma OS=Mus musculus GN=Tmpc      | Q61029       | 6.97                           | 1                            | 6.97        | 2.80       | 2.09    | 0.03705  |
| Methylthioribulose-1-phosphate dehydratase OS=Mus musculus GN=Apip PE=1 SV=1                    | Q9WVQ5       | 6.97                           | 1                            | 6.97        | 2.80       | 2.09    | 0.03705  |
| Proline-rich protein 11 OS=Mus musculus GN=Prr11 PE=2 SV=1                                      | Q8BHE0       | 6.97                           | 0                            | 6.97        | 2.80       | 2.09    | 0.03705  |
| Lamina-associated polypeptide 2, isoforms beta/delta/epsilon/gamma OS=Mus musculus GN=Tmpc      | Q61029; Q61  | 12.95                          | 2                            | 6.47        | 2.69       | 2.00    | 0.045306 |

Blue highlight identifies MICOS/MIB proteins identified in this screen

Yellow highlight identifies peptides from 3xMyc-CARD19 (the bait protein immunoprecipitated with the Myc nanobody)
